# Supplementary material for: Comparative Genomics, Phylogenetics, Biogeography, and Effects of Climate Change on Toddalia asiatica (L.) Lam. (Rutaceae) from Africa and Asia
Source: MDPI journal article supplement (doi:10.3390/plants11020231), 2022-01-17
Supplement: s1 [file s1]

## Supplementary Material

**Supplementary Table S1.** The lengths of introns and exons for the splitting genes.

| Gene     | Strand | Start  | End    | ExonI | IntronI | ExonII | IntronII | ExonIII |
|----------|--------|--------|--------|-------|---------|--------|----------|---------|
| trnK-UUU | -      | 1821   | 4400   | 38    | 2506    | 36     |          |         |
| rps16    | -      | 4936   | 6098   | 42    | 896     | 225    |          |         |
| trnS-CGA | +      | 9660   | 10473  | 31    | 721     | 62     |          |         |
| atpF     | -      | 12512  | 13869  | 145   | 797     | 416    |          |         |
| rpoC1    | -      | 22004  | 24824  | 422   | 787     | 1612   |          |         |
| ycf3     | -      | 45046  | 47080  | 129   | 732     | 228    | 793      | 153     |
| trnL-UAA | +      | 49942  | 50574  | 35    | 546     | 52     |          |         |
| trnV-UAC | -      | 53628  | 54289  | 37    | 569     | 56     |          |         |
| clpP     | -      | 72394  | 74497  | 71    | 866     | 291    | 650      | 226     |
| petD     | +      | 79013  | 80234  | 8     | 739     | 475    |          |         |
| rpl16    | -      | 83637  | 85079  | 9     | 1032    | 402    |          |         |
| rpl2     | -      | 86763  | 88280  | 391   | 657     | 470    |          |         |
| ndhB     | -      | 97448  | 99661  | 775   | 681     | 758    |          |         |
| trnE-UUC | +      | 105211 | 106244 | 32    | 962     | 40     |          |         |
| trnA-UGC | +      | 106315 | 107190 | 37    | 782     | 57     |          |         |
| ndhA     | +      | 119492 | 121741 | 553   | 1158    | 539    |          |         |
| trnA-UGC | -      | 137481 | 138356 | 37    | 782     | 57     |          |         |
| trnE-UUC | -      | 138427 | 139460 | 32    | 962     | 40     |          |         |
| ndhB     | +      | 145010 | 147223 | 775   | 681     | 758    |          |         |
| rpl2     | +      | 156391 | 157908 | 391   | 657     | 470    |          |         |
| trnK-UUU | -      | 1821   | 4400   | 38    | 2506    | 36     |          |         |

**Supplementary Table S2.** Relative synonymous Codon usage (RSCU) and percentage (%) RSCU analysis of *T. asiatica 002151*, *T. asiatica 003103* and *T. asiatica*.

| Amino Acid       | Codon | Count <i>Toddalia</i><br><i>002151</i> ) | RSCU | % RSCU | Count ( <i>Toddalia 003103</i> ) | RSCU | % RSCU | Count<br>( <i>T. asiatica</i><br>) | RSCU | % RSCU | %<br>RSCU |
|------------------|-------|------------------------------------------|------|--------|----------------------------------|------|--------|------------------------------------|------|--------|-----------|
| Phenylalanine(F) | UUU   | 2237                                     | 1.2  | 7.044  | 2239                             | 1.2  | 7.046  | 2229                               | 1.19 | 7.088  | 7.329     |
|                  | UUC   | 1485                                     | 0.8  |        | 1484                             | 0.8  |        | 1516                               | 0.81 |        |           |
| Leucine(L)       | UUA   | 1026                                     | 1.14 | 10.24  | 994                              | 1.11 | 10.20  | 1029                               | 1.17 | 10.01  | 9.998     |
|                  | UUG   | 1132                                     | 1.26 |        | 1124                             | 1.25 |        | 1127                               | 1.28 |        |           |
|                  | CUU   | 1196                                     | 1.33 |        | 1203                             | 1.34 |        | 1136                               | 1.29 |        |           |
|                  | CUC   | 700                                      | 0.78 |        | 698                              | 0.78 |        | 675                                | 0.77 |        |           |
|                  | CUA   | 839                                      | 0.93 |        | 838                              | 0.93 |        | 831                                | 0.94 |        |           |
| Isoleucine(I)    | CUG   | 515                                      | 0.57 | 8.234  | 533                              | 0.59 | 8.261  | 492                                | 0.56 | 8.104  | 8.111     |
|                  | AUU   | 1841                                     | 1.27 |        | 1808                             | 1.24 |        | 1766                               | 1.24 |        |           |
|                  | AUC   | 1111                                     | 0.77 |        | 1096                             | 0.75 |        | 1074                               | 0.75 |        |           |
|                  | AUA   | 1399                                     | 0.96 |        | 1461                             | 1    |        | 1442                               | 1.01 |        |           |
|                  |       |                                          |      |        |                                  |      |        |                                    |      |        |           |
| Methionine(M)    | AUG   | 901                                      | 1    |        | 887                              | 1    |        | 859                                | 1    | 1.626  |           |
| Valine(V)        | GUU   | 808                                      | 1.37 | 1.705  | 811                              | 1.38 | 1.679  | 781                                | 1.37 | 4.323  | 1.659     |
|                  | GUC   | 461                                      | 0.78 |        | 470                              | 0.8  |        | 435                                | 0.76 |        |           |
|                  | GUA   | 673                                      | 1.14 |        | 659                              | 1.12 |        | 633                                | 1.11 |        |           |
|                  | GUG   | 419                                      | 0.71 |        | 408                              | 0.7  |        | 435                                | 0.76 |        |           |
| Serine(S)        | UCU   | 1077                                     | 1.39 | 8.7819 | 1081                             | 1.39 | 8.812  | 1126                               | 1.38 | 9.234  | 9.413     |
|                  | UCC   | 855                                      | 1.11 |        | 883                              | 1.14 |        | 898                                | 1.1  |        |           |
|                  | UCA   | 886                                      | 1.15 |        | 864                              | 1.11 |        | 974                                | 1.2  |        |           |
|                  | UCG   | 652                                      | 0.84 |        | 641                              | 0.83 |        | 662                                | 0.81 |        |           |
|                  | AGU   | 674                                      | 0.87 |        | 679                              | 0.88 |        | 687                                | 0.84 |        |           |
| Proline(P)       | AGC   | 496                                      | 0.64 | 4.938  | 508                              | 0.65 | 4.957  | 532                                | 0.65 | 4.9152 | 4.792     |
|                  | CCU   | 730                                      | 1.12 |        | 702                              | 1.07 |        | 648                                | 1    |        |           |
|                  | CCC   | 665                                      | 1.02 |        | 678                              | 1.04 |        | 679                                | 1.05 |        |           |
|                  | CCA   | 745                                      | 1.14 |        | 775                              | 1.18 |        | 811                                | 1.25 |        |           |
| Threonine(T)     | CCG   | 469                                      | 0.72 | 4.114  | 464                              | 0.71 | 4.139  | 459                                | 0.71 | 4.321  | 4.416     |
|                  | ACU   | 635                                      | 1.17 |        | 635                              | 1.16 |        | 658                                | 1.15 |        |           |
|                  | ACC   | 563                                      | 1.04 |        | 585                              | 1.07 |        | 589                                | 1.03 |        |           |
|                  | ACA   | 627                                      | 1.15 |        | 624                              | 1.14 |        | 651                                | 1.14 |        |           |
| Alanine(A)       | ACG   | 349                                      | 0.64 | 3.093  | 343                              | 0.63 | 3.0992 | 385                                | 0.67 |        |           |
|                  | GCU   | 482                                      | 1.18 |        | 485                              | 1.19 |        | 455                                | 1.15 |        |           |
|                  | GCC   | 381                                      | 0.93 |        | 378                              | 0.93 |        | 408                                | 1.03 |        |           |

|                   |     |      |      |       |      |      |       |      |      |       |       |
|-------------------|-----|------|------|-------|------|------|-------|------|------|-------|-------|
|                   | GCA | 470  | 1.15 |       | 476  | 1.17 |       | 448  | 1.13 | 2.999 | 3.092 |
|                   | GCG | 301  | 0.74 |       | 295  | 0.72 |       | 274  | 0.69 |       |       |
| Tyrosine(Y)       | UAU | 1411 | 1.33 |       | 1412 | 1.33 |       | 1399 | 1.33 | 3.975 |       |
|                   | UAC | 703  | 0.67 | 4.001 | 705  | 0.67 | 3.898 | 701  | 0.67 |       | 3.966 |
| Histidine(H)      | CAU | 921  | 1.37 |       | 991  | 1.41 |       | 912  | 1.37 | 2.511 |       |
|                   | CAC | 419  | 0.63 | 2.536 | 415  | 0.59 | 2.661 | 415  | 0.63 |       | 2.425 |
| Glutamine(Q)      | CAA | 1159 | 1.4  |       | 1181 | 1.41 |       | 1097 | 1.36 | 3.057 | 2.848 |
|                   | CAG | 496  | 0.6  | 3.132 | 496  | 0.59 | 3.174 | 518  | 0.64 |       |       |
| Asparagine(N)     | AAU | 1709 | 1.36 |       | 1732 | 1.36 |       | 1704 | 1.37 | 4.720 |       |
|                   | AAC | 805  | 0.64 | 4.758 | 811  | 0.64 | 4.813 | 790  | 0.63 |       | 4.966 |
| Lysine(K)         | AAA | 2098 | 1.34 |       | 2099 | 1.33 |       | 2077 | 1.33 | 5.891 |       |
|                   | AAG | 1044 | 0.66 | 5.947 | 1053 | 0.67 | 5.966 | 1036 | 0.67 |       | 5.947 |
| Aspartic acid(D)  | GAU | 1066 | 1.37 |       | 1067 | 1.37 |       | 1056 | 1.43 | 2.795 |       |
|                   | GAC | 491  | 0.63 | 2.947 | 490  | 0.63 | 2.946 | 421  | 0.57 |       | 2.973 |
| Glutamic acid (E) | GAA | 1312 | 1.34 |       | 1303 | 1.33 |       | 1391 | 1.39 |       |       |
|                   | GAG | 649  | 0.66 | 3.711 | 659  | 0.67 | 3.713 | 605  | 0.61 | 3.777 | 3.909 |
| Cysteine (C)      | UGU | 691  | 1.27 |       | 672  | 1.26 |       | 648  | 1.12 | 2.194 |       |
|                   | UGC | 401  | 0.73 | 2.084 | 395  | 0.74 | 2.019 | 511  | 0.88 |       | 2.106 |
| Tryptophan (W)    | 732 |      | 1    |       | 694  | 1    |       | 714  | 1    | 1.351 |       |
|                   | UGG |      |      | 1.385 |      |      | 1.313 |      |      |       | 1.336 |
| Arginine (R)      | CGU | 408  | 0.68 |       | 414  | 0.7  |       | 431  | 0.73 |       |       |
|                   | CGC | 296  | 0.49 |       | 298  | 0.5  |       | 308  | 0.53 |       |       |
|                   | CGA | 700  | 1.17 |       | 694  | 1.17 |       | 692  | 1.18 | 6.660 |       |
|                   | CGG | 474  | 0.79 | 6.800 | 472  | 0.8  | 6.726 | 444  | 0.76 |       | 6.446 |
|                   | AGA | 1072 | 1.79 |       | 1038 | 1.75 |       | 1020 | 1.74 |       |       |
|                   | AGG | 643  | 1.07 |       | 638  | 1.08 |       | 624  | 1.06 |       |       |
| Glycine(G)        | GGU | 576  | 0.96 |       | 574  | 0.96 |       | 561  | 0.93 |       | 3.616 |
|                   | GGC | 382  | 0.64 |       | 404  | 0.68 |       | 433  | 0.72 | 4.559 |       |
|                   | GGA | 798  | 1.33 | 3.323 | 768  | 1.28 | 4.525 | 799  | 1.33 |       |       |
|                   | GGG | 645  | 1.07 |       | 645  | 1.08 |       | 616  | 1.02 |       |       |
| Stop codon(*)     | UAA | 1121 | 1.15 |       | 1134 | 1.17 |       | 1209 | 1.18 | 5.837 |       |
|                   | UAG | 824  | 0.84 | 5.555 | 808  | 0.83 | 5.501 | 853  | 0.83 |       | 5.229 |
|                   | UGA | 990  | 1.01 |       | 965  | 1    |       | 1022 | 0.99 |       |       |

**Supplementary Table S3:** *Toddalia asiatica* long repeats.

| Repeat size (bp) | 1st start | Repeat type | 2nd start | location 1                    | location 2                     | Region    |
|------------------|-----------|-------------|-----------|-------------------------------|--------------------------------|-----------|
| 73               | 40896     | F           | 43120     |                               |                                |           |
|                  |           |             |           | <i>psaB</i>                   | <i>PsaA</i>                    | LSC       |
| 55               | 40914     | F           | 43138     |                               |                                |           |
|                  |           |             |           | <i>psaB</i>                   | <i>PsaA</i>                    | LSC       |
| 48               | 30944     | P           | 30944     | <i>IGS(petN-psbM)</i>         | <i>IGS(petN-psbM)</i>          | LSC       |
| 48               | 76289     | P           | 76289     |                               |                                |           |
|                  |           |             |           | <i>psbB</i>                   | <i>psbB</i>                    | LSC       |
| 41               | 67276     | F           | 71103     | <i>IGS(psbE-petL)</i>         | <i>rpl20</i>                   | LSC       |
| 40               | 110771    | P           | 110771    | <i>IGS(rrn5-trnR-ACG)</i>     | <i>IGS(rrn5-trnR-CG)</i>       | IRb       |
| 40               | 110771    | F           | 132972    | <i>IGS(rrn5-trnR-ACG)</i>     | <i>IGS(trnN-GUU- trnR-ACG)</i> | IRa/IRb   |
| 40               | 132972    | P           | 132972    | <i>IGS(trnN-GUU-trnR-ACG)</i> | <i>IGS(trnN-GUU- trnR-ACG)</i> | IRb       |
| 41               | 100897    | F           | 123067    | <i>rps12</i>                  | <i>ndhA</i>                    | IRb/IRa   |
| 41               | 123067    | P           | 142845    | <i>ndhA</i>                   | <i>IGS(rps12-trnV-GAC)</i>     | IRa       |
| 40               | 93484     | F           | 93502     | <i>Ycf2</i>                   | <i>Ycf2</i>                    | IRa       |
| 40               | 93484     | P           | 150241    | <i>Ycf2</i>                   | <i>Ycf2</i>                    | IRa / IRb |
| 40               | 93502     | P           | 150259    | <i>Ycf2</i>                   | <i>Ycf2</i>                    | IRa/ IRb  |
| 40               | 150241    | F           | 150259    | <i>Ycf2</i>                   | <i>Ycf2</i>                    | IRb/IRa   |
| 30               | 69885     | P           | 69885     | <i>IGS(psaJ-rp133)</i>        | <i>IGS(psaJ-rp133)</i>         | LSC       |
| 30               | 79141     | P           | 79141     | <i>petD</i>                   | <i>petD</i>                    | LSC       |
| 34               | 109986    | F           | 110018    | <i>rrn23</i>                  | <i>rrn23</i>                   | IRb       |
| 34               | 109986    | P           | 133731    | <i>rrn23</i>                  | <i>Ycf2</i>                    | IRb/IRa   |
| 34               | 110018    | P           | 133763    | <i>rrn23</i>                  | <i>Ycf2</i>                    | IRb/IRa   |
| 34               | 133731    | F           | 133763    | <i>IGS(rrn5-trnR-ACG)</i>     | <i>IGS(rrn5-trnR-ACG)</i>      | IRb       |
| 30               | 8134      | P           | 47262     | <i>IGS(psbk-psbI)</i>         | <i>Ycf3</i>                    | LSC       |
| 31               | 10321     | F           | 10348     | <i>IGS(trnS-GCU-trnG-UCC)</i> | <i>trnG-UCC</i>                | LSC       |
| 33               | 29896     | F           | 29928     | <i>IGS (trnC-GCU- PetN)</i>   | <i>IGS(trnC-GCU- PetN)</i>     | LSC       |
| 32               | 8132      | F           | 37441     | <i>IGS(psbk-psbI)</i>         | <i>psbC</i>                    | LSC       |
| 32               | 101300    | C           | 142455    | <i>rps12</i>                  | <i>IGS (trnV-GAC- rps12)</i>   | LSC/IRA   |
| 73               | 40896     | F           | 43120     | <i>psaB</i>                   | <i>psaA</i>                    | LSC       |

|    |        |   |        |                         |                         |         |
|----|--------|---|--------|-------------------------|-------------------------|---------|
| 55 | 40914  | P | 43138  | psaB                    | psaA                    | LSC     |
| 48 | 30944  |   | 30944  |                         |                         |         |
|    |        | F |        | IGS(petN-psbM)          | IGS(petN-psbM)          | LSC     |
| 48 | 76289  | F | 76289  | psaB                    | psaB                    | LSC     |
| 41 | 67276  | F | 71103  | IGS(psbE-petL)          | rpl20                   | LSC     |
| 40 | 110771 |   | 110771 | IGS(rrn5-trnR-ACG)      | IGS(rrn5-trnR-CG)       | IRb     |
|    |        | F |        |                         |                         |         |
| 40 | 110771 |   | 132972 | IGS(rrn5-trnR-ACG)      | IGS(trnN-GUU- trnR-ACG) | IRb/IRa |
|    |        | P |        |                         |                         |         |
| 40 | 132972 |   | 132972 | IGS(trnN-GUU- trnR-ACG) | IGS(trnN-GUU- trnR-ACG) | IRb     |
|    |        | P |        |                         |                         |         |
| 41 | 100897 | F | 123067 | rps12                   | ndhA                    | IRa     |

**Supplementary Table S4:** SRRs present in *Toddalia* species.

| SSR number | SSR type | SSR   | Size | Start | End   | location                 | region |
|------------|----------|-------|------|-------|-------|--------------------------|--------|
| 1          | p1       | (T)12 | 12   | 1736  | 1747  | IGS (psbA-trnK-UUU)      | LSC    |
| 2          | p1       | (T)11 | 11   | 2375  | 2385  | trnK-UUU                 | LSC    |
| 3          | p1       | (A)12 | 12   | 4649  | 4660  | trnK-UUU                 | LSC    |
| 4          | p1       | (A)11 | 11   | 6264  | 6274  | rpl16                    | LSC    |
| 5          | p1       | (A)10 | 10   | 6767  | 6776  | IGS (rpl16-trnQ-UUG)     | LSC    |
| 6          | p1       | (T)10 | 10   | 7320  | 7329  | IGS (rpl16-trnQ-UUG)     | LSC    |
| 7          | p1       | (A)11 | 11   | 7746  | 7756  | IGS (rpl16-trnQ-UUG)     | LSC    |
| 8          | p1       | (T)10 | 10   | 8294  | 8303  | IGS (psbK-psbI)          | LSC    |
| 9          | p1       | (A)10 | 10   | 8447  | 8456  | IGS (psbK-psbI)          | LSC    |
| 10         | p1       | (A)11 | 11   | 8680  | 8690  | IGS (trnS-GCU- trnS-GCA) | LSC    |
| 11         | p1       | (T)13 | 13   | 9282  | 9294  | IGS (trnS-GCU- trnS-GCA) | LSC    |
| 12         | p1       | (A)13 | 13   | 13375 | 13387 | atpf                     | LSC    |
| 13         | p1       | (G)10 | 10   | 15538 | 15547 | IGS (atpI-atpH)          | LSC    |
| 14         | p1       | (A)10 | 10   | 17453 | 17462 | IGS (rps2-rpoc2)         | LSC    |
| 15         | p1       | (T)11 | 11   | 19569 | 19579 | rpoc2                    | LSC    |
| 16         | p2       | (AT)5 | 10   | 21064 | 21073 | rpoc2                    | LSC    |
| 17         | p1       | (A)10 | 10   | 23741 | 23750 | rpoc1                    | LSC    |
| 18         | p1       | (T)10 | 10   | 24123 | 24132 | rpoc1                    | LSC    |
| 19         | p1       | (T)10 | 10   | 27417 | 27426 | rpoB                     | LSC    |
| 20         | c        | (A)11 | 106  | 29083 | 29188 | IGS (rpoB-trnC-GCA)      | LSC    |
| 21         | p1       | (A)12 | 12   | 29824 | 29835 | IGS (trnC-GCA-petN)      | LSC    |
| 22         | p1       | (T)10 | 10   | 31942 | 31951 | IGS (psbM-trnD-GUC)      | LSC    |
| 23         | p1       | (T)14 | 14   | 32120 | 32133 | IGS (psbM-trnD-GUC)      | LSC    |

|    |    |         |     |        |        |                                    |     |
|----|----|---------|-----|--------|--------|------------------------------------|-----|
| 24 | p1 | (A)14   | 14  | 32554  | 32567  | IGS ( <i>trnD-GUC- trnY-GUA</i> )  | LSC |
| 25 | p4 | (AAAT)3 | 12  | 32704  | 32715  | IGS ( <i>trnD-GUC- trnY-GUA</i> )  | LSC |
| 26 | p1 | (T)11   | 11  | 33478  | 33488  | IGS ( <i>trnE-UUC- trnT-GGU</i> )  | LSC |
| 27 | p1 | (T)10   | 10  | 35012  | 35021  | IGS ( <i>trnT-GGU-psbD</i> )       | LSC |
| 28 | p1 | (G)11   | 11  | 36743  | 36753  | <i>psbC</i>                        | LSC |
| 29 | c  | (AT)5   | 114 | 38727  | 38840  | IGS ( <i>PsbZ-trnG-GCC</i> )       | LSC |
| 30 | p4 | (TAAA)4 | 16  | 45018  | 45033  | IGS ( <i>PsaA-Ycf3</i> )           | LSC |
| 31 | p1 | (T)10   | 10  | 45894  | 45903  | <i>Ycf3</i>                        | LSC |
| 32 | p1 | (A)11   | 11  | 47183  | 47193  | IGS ( <i>Ycf3-trnS-GGA</i> )       | LSC |
| 33 | p1 | (T)10   | 10  | 48486  | 48495  | IGS ( <i>rps4-trnt-GGU</i> )       | LSC |
| 34 | p4 | (TAAT)3 | 12  | 49504  | 49515  | IGS ( <i>trnt-GGU-trnL-UAA</i> )   | LSC |
| 35 | c  | (T)12   | 70  | 51107  | 51176  | IGS ( <i>trnF-GAA-ndhJ</i> )       | LSC |
| 36 | p1 | (T)10   | 10  | 52788  | 52797  | IGS ( <i>ndhc- trnV-UAC</i> )      | LSC |
| 37 | p3 | (TTA)4  | 12  | 53602  | 53613  | IGS ( <i>ndhc- trnV-UAC</i> )      | LSC |
| 38 | p1 | (T)11   | 11  | 56703  | 56713  | IGS ( <i>atpB- rbcL</i> )          | LSC |
| 39 | p2 | (TA)5   | 10  | 57075  | 57084  | IGS ( <i>atpB- rbcL</i> )          | LSC |
| 40 | c  | (T)11   | 115 | 60950  | 61064  | IGS ( <i>accD- psal</i> )          | LSC |
| 41 | p3 | (TAA)4  | 12  | 61355  | 61366  | IGS ( <i>accD- psal</i> )          | LSC |
| 42 | p1 | (T)10   | 10  | 61767  | 61776  | IGS ( <i>Psbl- Ycf4</i> )          | LSC |
| 43 | p1 | (T)11   | 11  | 62797  | 62807  | IGS ( <i>ycf4- cemA</i> )          | LSC |
| 44 | p1 | (T)11   | 11  | 67434  | 67444  | IGS ( <i>psbE- petL</i> )          | LSC |
| 45 | p1 | (A)10   | 10  | 68987  | 68996  | IGS ( <i>trnW-CAA-trnP-UUG</i> )   | LSC |
| 46 | c  | (A)11   | 81  | 69239  | 69319  | IGS ( <i>trnP-UUG-psal</i> )       | LSC |
| 47 | p4 | (TAGA)3 | 12  | 69712  | 69723  | IGS ( <i>trnW-CAA-trnP-UUG</i> )   | LSC |
| 48 | p4 | (AAAT)3 | 12  | 70399  | 70410  | IGS ( <i>rpl33-rps18</i> )         | LSC |
| 49 | p1 | (A)10   | 10  | 70897  | 70906  | IGS ( <i>rps18-rpl20</i> )         | LSC |
| 50 | p3 | (TTC)4  | 12  | 72067  | 72078  | IGS ( <i>rpl20-rps12</i> )         | LSC |
| 51 | p1 | (T)10   | 10  | 72978  | 72987  | <i>clpP</i>                        | LSC |
| 52 | p1 | (A)10   | 10  | 73143  | 73152  | <i>clpP</i>                        | LSC |
| 53 | p1 | (T)12   | 12  | 76562  | 76573  | <i>psbB</i>                        | LSC |
| 54 | p1 | (T)12   | 12  | 84295  | 84306  | <i>rpl2</i>                        | LSC |
| 55 | p1 | (T)14   | 14  | 85939  | 85952  | <i>rpl23</i>                       | LSC |
| 56 | p3 | (AAG)4  | 12  | 96318  | 96329  | IGS ( <i>Ycf2-trnL-CAA</i> )       | IRa |
| 57 | p1 | (T)14   | 14  | 101749 | 101762 | IGS ( <i>rps7-rps12</i> )          | IRa |
| 58 | p1 | (A)10   | 10  | 105584 | 105593 | <i>trnE-UUC</i>                    | IRa |
| 59 | p1 | (A)14   | 14  | 110785 | 110798 | IGS ( <i>rrn5-trnR-ACG</i> )       | IRa |
| 60 | p1 | (A)10   | 10  | 111225 | 111234 | IGS ( <i>trnN-ACG-trnN-GUU-Y</i> ) | IRa |
| 61 | p1 | (A)12   | 12  | 113027 | 113038 | <i>Ycf1</i>                        | IRa |
| 62 | p1 | (A)12   | 12  | 115536 | 115547 | <i>Ycf1</i>                        | SSC |
| 63 | p4 | (TATT)3 | 12  | 116258 | 116269 | <i>Ycf1</i>                        | SSC |

|    |    |        |    |        |        |                                  |     |
|----|----|--------|----|--------|--------|----------------------------------|-----|
| 64 | c  | (A)11  | 29 | 116713 | 116741 | <i>Ycf1</i>                      | SSC |
| 65 | p1 | (T)12  | 12 | 118627 | 118638 | IGS ( <i>rps15-ndH</i> )         | SSC |
| 66 | p2 | (AT)5  | 10 | 120068 | 120077 | <i>ndhA</i>                      | SSC |
| 67 | p1 | (A)10  | 10 | 120297 | 120306 | <i>ndhA</i>                      | SSC |
| 68 | c  | (TA)5  | 28 | 122142 | 122169 | <i>ndhA</i>                      | SSC |
| 69 | p1 | (A)10  | 10 | 123680 | 123689 | <i>ndhE</i>                      | SSC |
| 70 | p1 | (T)11  | 11 | 129789 | 129799 | <i>ndhF</i>                      | SSC |
| 71 | p1 | (T)12  | 12 | 131631 | 131642 | <i>Ycf1</i>                      | SSC |
| 72 | p1 | (T)10  | 10 | 133435 | 133444 | IGS ( <i>trnN-GUU-trnR-ACG</i> ) | IRb |
| 73 | p1 | (T)14  | 14 | 133871 | 133884 | IGS ( <i>trnR-ACG-rrn5</i> )     | IRb |
| 74 | p1 | (T)10  | 10 | 139076 | 139085 | <i>trnE-UUC</i>                  | IRb |
| 75 | p1 | (A)14  | 14 | 142907 | 142920 | IGS ( <i>Ycf15-rp`s12</i> )      | IRb |
| 76 | p3 | (CTT)4 | 12 | 148340 | 148351 | IGS ( <i>trnL-CAA- ycf2</i> )    | IRb |

**Supplementary Table S5:** Total number of SSRs repeats.

| SSRs              | <i>T. asiatica</i> 002151 | <i>T. asiatica</i> 003103 |
|-------------------|---------------------------|---------------------------|
| A/T               | 60                        | 60                        |
| C/G               | 2                         | 2                         |
| AT/AT             | 6                         | 6                         |
| AAG/CTT           | 3                         | 3                         |
| AAT/ATT           | 4                         | 4                         |
| AAAT/ATTT         | 4                         | 4                         |
| AACT/AGTT         | 1                         | 1                         |
| AATT/AATT         | 1                         | 1                         |
| ACAT/ATGT         | 1                         | 1                         |
| AGAT/ATCT         | 1                         | 1                         |
| Total no. of SSRs | 83                        | 83                        |

**Supplementary Table S6:** Model Mean performance (per species), using test dataset (generated using partitioning) of *Toddalia asiatica*

| Methods | AUC  | COR  | TSS  | Deviance |
|---------|------|------|------|----------|
| Maxent  | 0.98 | 0.88 | 0.86 | 0.61     |

**Supplementary Table S7.** Information of two newly sequenced plastomes.

| Species                         | Sample locality  | Voucher (Herbarium) | GenBank accession |
|---------------------------------|------------------|---------------------|-------------------|
| <i>Toddalia asiatica</i> 002151 | Mt. Kenya, Kenya | SAJIT-002151        | OK127881          |
| <i>Toddalia asiatica</i> 003103 | Mt. Kenya, Kenya | SAJIT-003103        | OK127880          |

**Supplementary Table S8.** The plastomes obtained from GenBank in this study.

| Species                            | GenBank accession |
|------------------------------------|-------------------|
| <i>Phellodendron chinense</i>      | NC050949          |
| <i>Tetradium daniellii</i>         | MW542638          |
| <i>Toddalia asiatica</i>           | MW542637          |
| <i>Ailanthus altissima</i>         | MG799542          |
| <i>Atalantia kwangtungensis</i>    | MH329190          |
| <i>Casimiroa edulis</i>            | MN539263          |
| <i>Citrus aurantiifolia</i>        | KJ865401          |
| <i>Citrus hongheensis</i>          | MT880607          |
| <i>Clausena excavate</i>           | KU949003          |
| <i>Glycosmis mauritiana</i>        | KU949004          |
| <i>Glycosmis pentaphylla</i>       | KU949005          |
| <i>Leitneria floridana</i>         | KT692940          |
| <i>Melicope pteleifolia</i>        | MW046256          |
| <i>Merrillia caloxylon</i>         | KU949006          |
| <i>Micromelum minutum</i>          | KU949007          |
| <i>Murraya koenigii</i>            | KU949002          |
| <i>Phellodendron amurense</i>      | NC_035551         |
| <i>Ruta graveolens</i>             | MN326012          |
| <i>Tetradium ruticarpum</i>        | MT134114          |
| <i>Zanthoxylum acanthopodium</i>   | MT795653          |
| <i>Zanthoxylum armatum</i>         | MT990984          |
| <i>Zanthoxylum bungeanum</i>       | KX497031          |
| <i>Zanthoxylum calcicola</i>       | MT990983          |
| <i>Zanthoxylum madagascariense</i> | MN968551          |
| <i>Zanthoxylum nitidum</i>         | MK613864          |
| <i>Zanthoxylum oxyphyllum</i>      | MT990980          |
| <i>Zanthoxylum paniculatum</i>     | MN968552          |
| <i>Zanthoxylum piasezkii</i>       | MT990979          |
| <i>Zanthoxylum pinnatum</i>        | MN968553          |



*Zanthoxylum piperitum*  
*Zanthoxylum schinifolium*  
*Zanthoxylum simulans*  
*Zanthoxylum tragodes*

KT153018  
KT321318  
MF716524  
MN968554

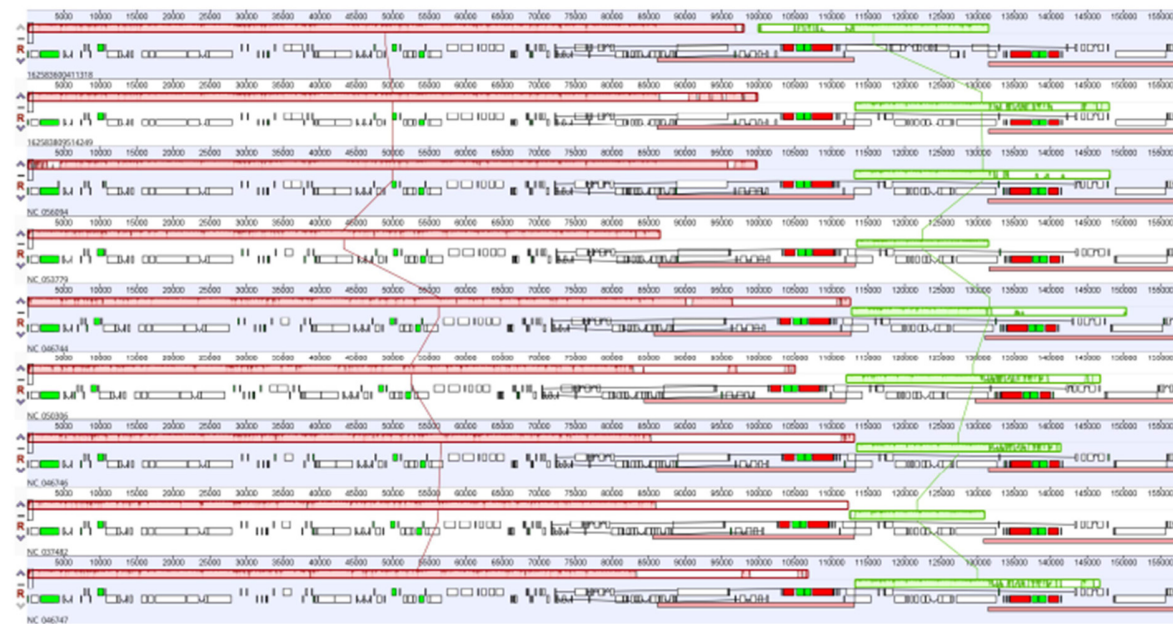

Supplementary Figure S1: Mauve alignment of the three *Toddalia* species.

## Ecological Niche described by: bio9 – bio13

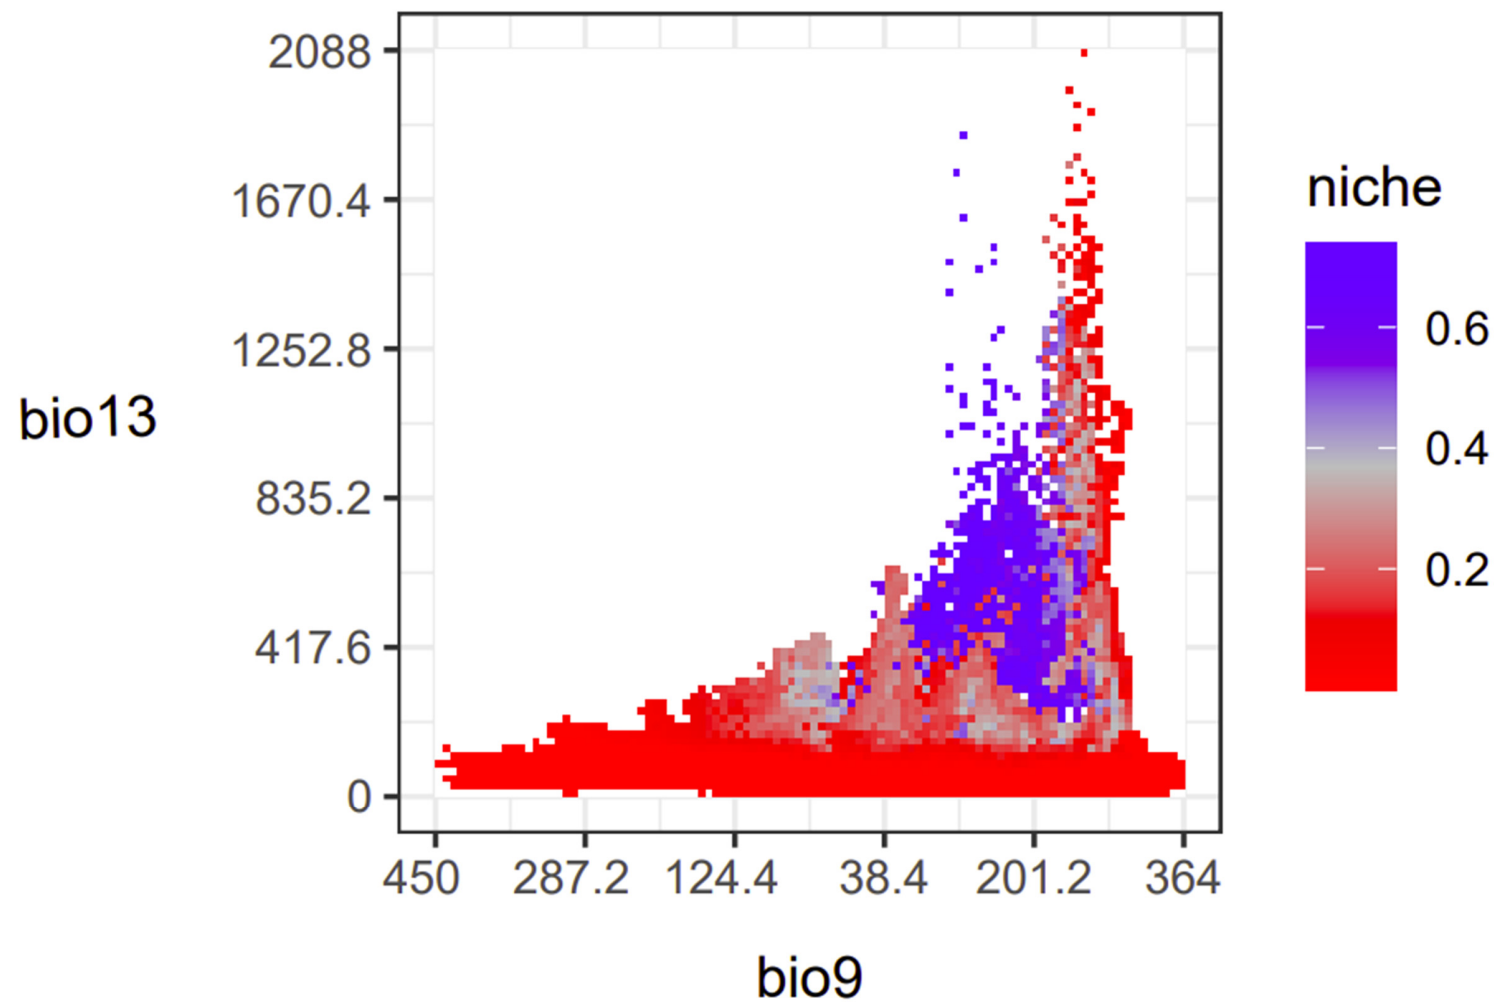

**Supplementary Figure S2:** Ecological niche of *Toddalia* species.

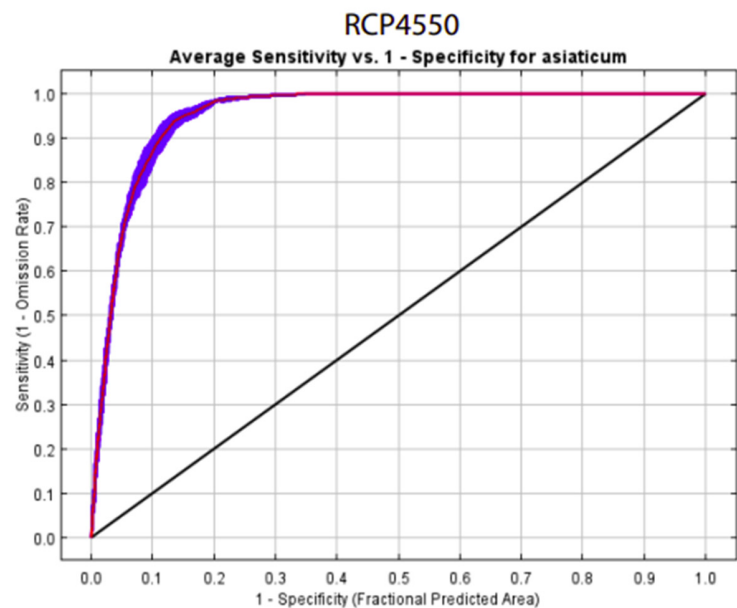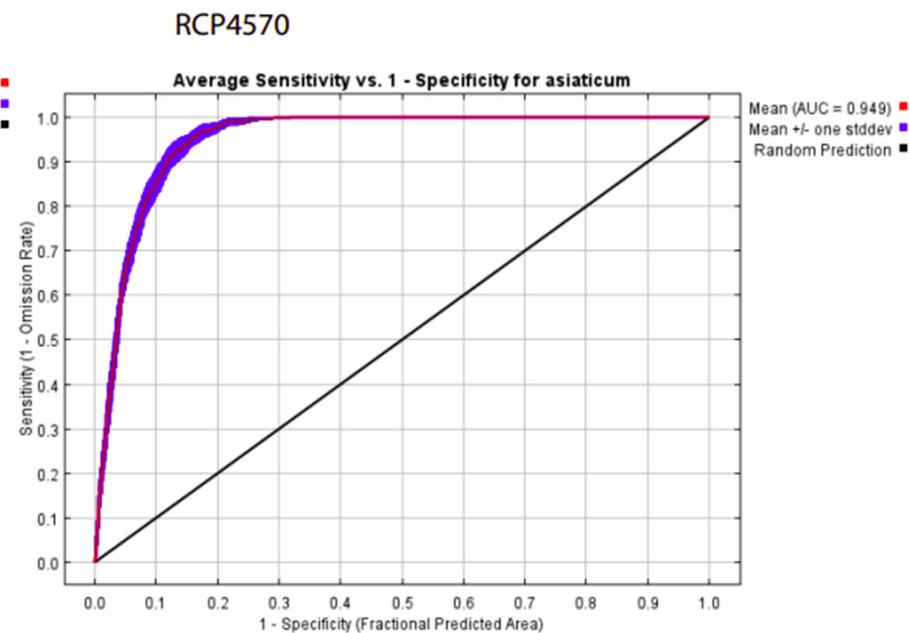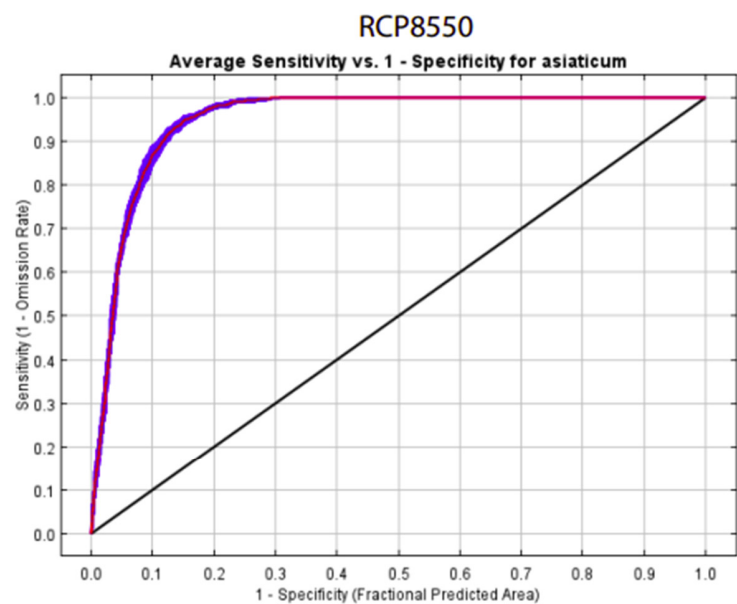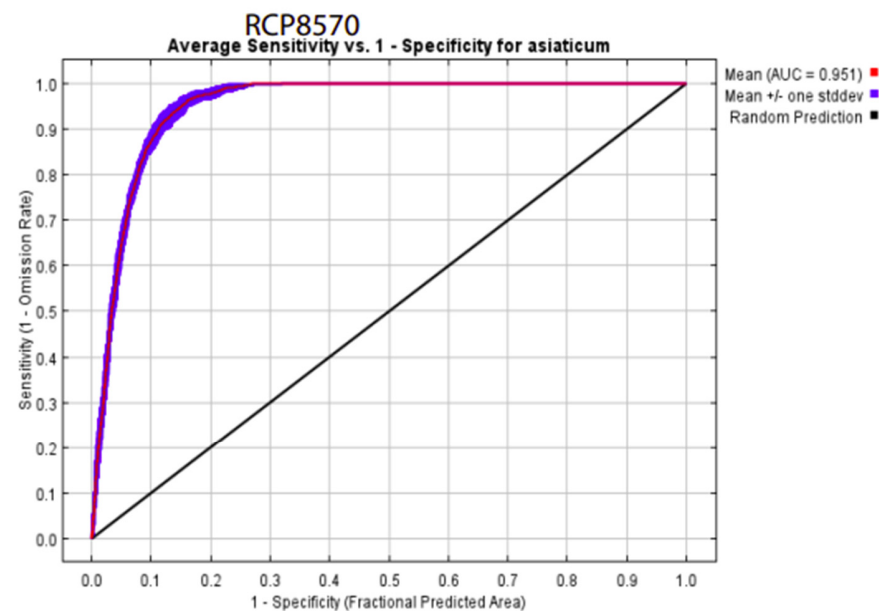

Supplementary Figure S3: ROC-AUC curves of the five models.
